# Supplementary material for: Effective modulation of intramolecular ferromagnetic interaction of diradicals by functionalization of cross-conjugated coupler
Source: Royal Society of Chemistry journal article supplement (doi:10.1039/c8cp03689f), 2018-01-01
Supplement: c8cp03689f1.pdf [file c8cp03689f1.pdf]

# Effective modulation of intramolecular ferromagnetic interaction of diradicals by functionalization of cross-conjugated coupler

Francis Kirby B. Burnea,<sup>a</sup> Kyoung Chul Ko<sup>\*b</sup> and Jin Yong Lee<sup>\*a,c</sup>

<sup>a</sup>Department of Chemistry, Sungkyunkwan University, Suwon 16419, Korea

<sup>b</sup>Department of Chemistry Education, Chonnam National University, Gwang-ju 61186, Korea.

<sup>c</sup>School of Chemistry and Chemical Engineering, University of Jinan, Jinan 250022, China.

**Corresponding Authors:**

[jinylee@skku.edu](mailto:jinylee@skku.edu)

[kcko1982@jnu.ac.kr](mailto:kcko1982@jnu.ac.kr)

**Table S1.** List of couplers studied in this reference<sup>1</sup> and their corresponding LUMO energies calculated at B3LYP/6-311++G(d,p).

| Coupler        | LUMO energy (eV) |
|----------------|------------------|
| 2,5-furan      | -0.17            |
| 2,5-pyrrole    | -0.34            |
| 2,5-phenylene  | -0.48            |
| 1,2,4-triazole | -0.50            |
| 2,5-thiophene  | -0.70            |
| 2,5-pyridine   | -1.14            |
| 2,5-phosphole  | -1.45            |
| 1,3-azulene    | -2.27            |

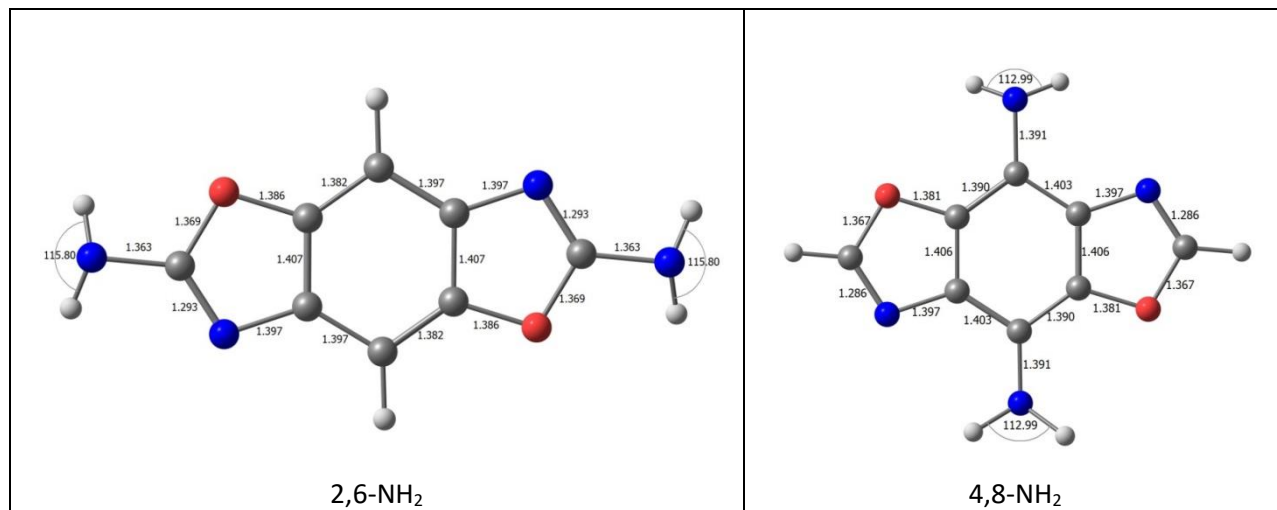

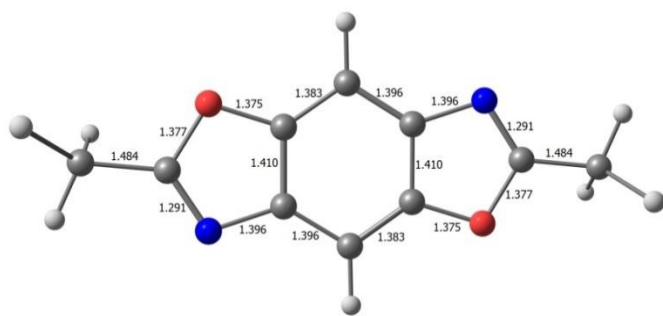

2,6-CH<sub>3</sub>

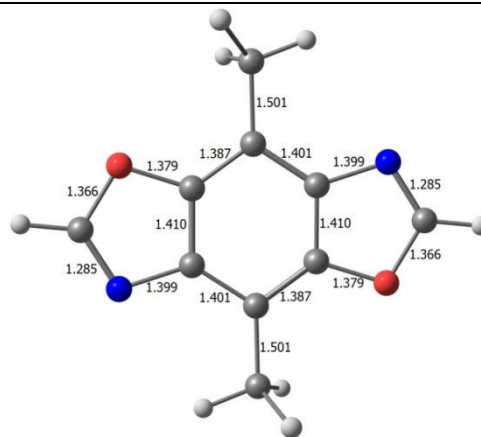

4,8-CH<sub>3</sub>

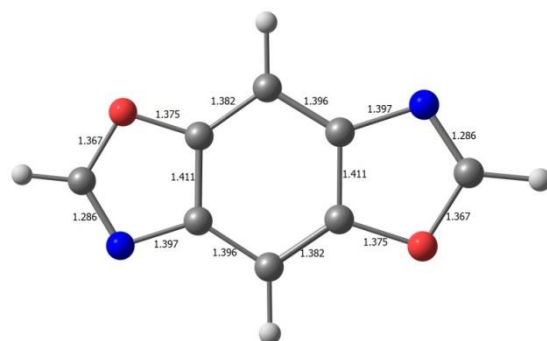

BBO (can also be referred to as 2,6-H or 4,8-H)

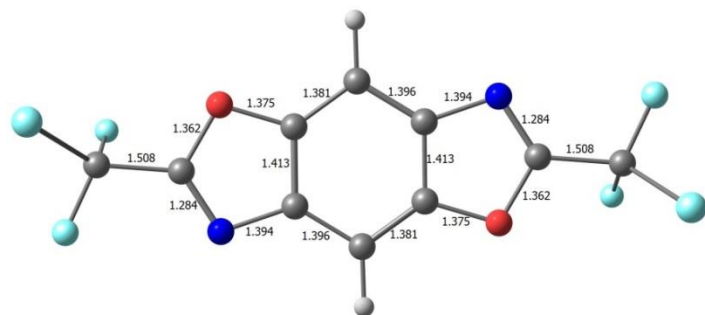

2,6-CF<sub>3</sub>

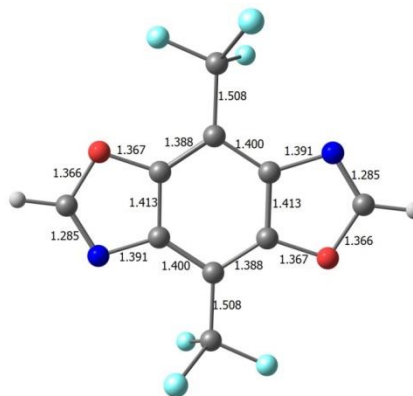

4,8-CF<sub>3</sub>

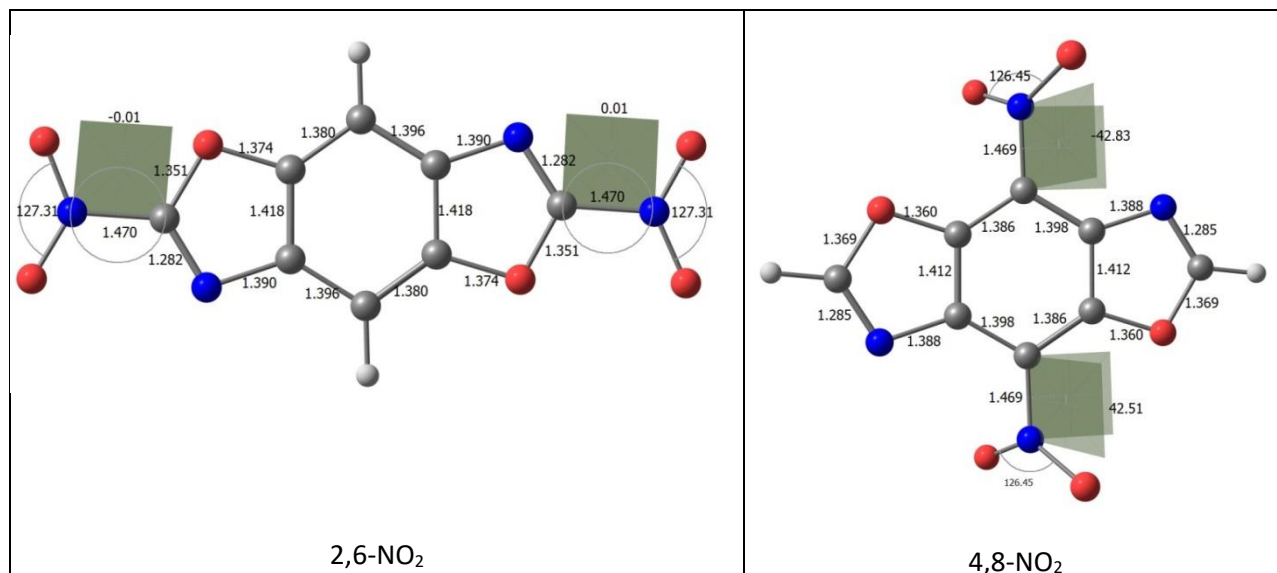

**Figure S1.** Optimized structures of functionalized BBOs showing the bond distances in Angstroms (Å). Bond angles for NH<sub>2</sub> and NO<sub>2</sub> are also shown as well as the dihedral angle for the case of BBO-NO<sub>2</sub>. Structures in the left columns are for the 2,6-X and those in the right are for the 4,8-X (X=substituents).

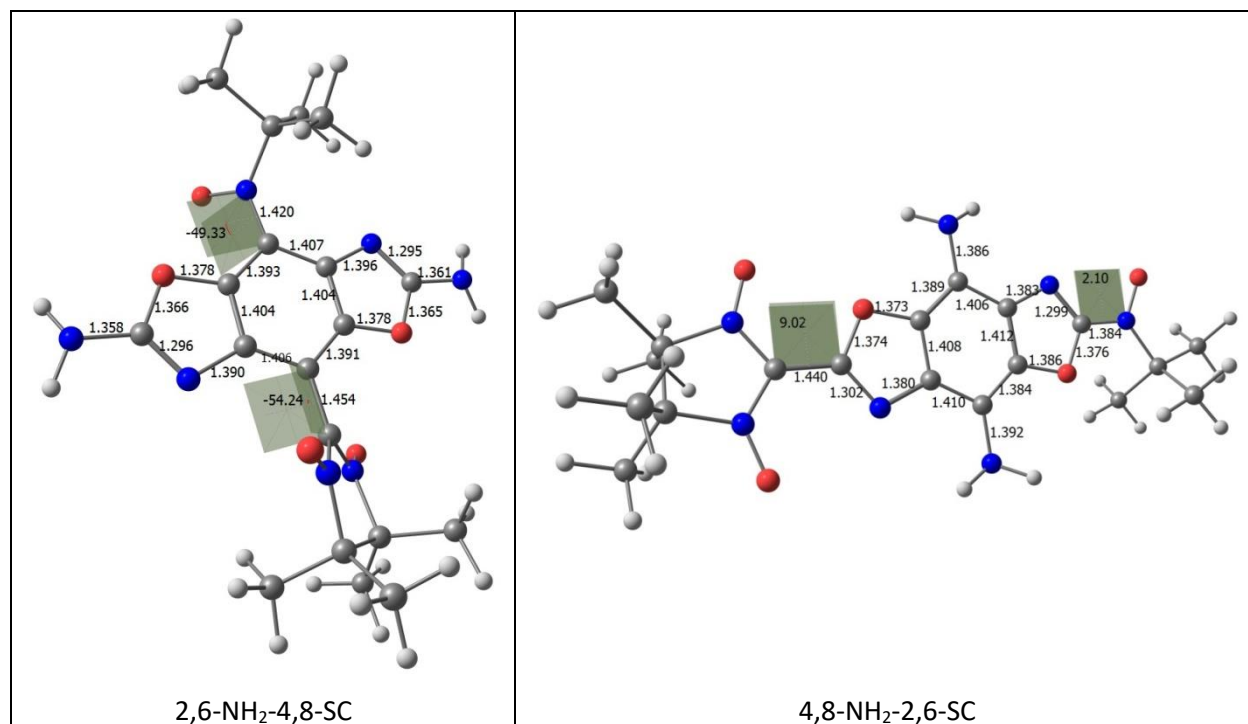

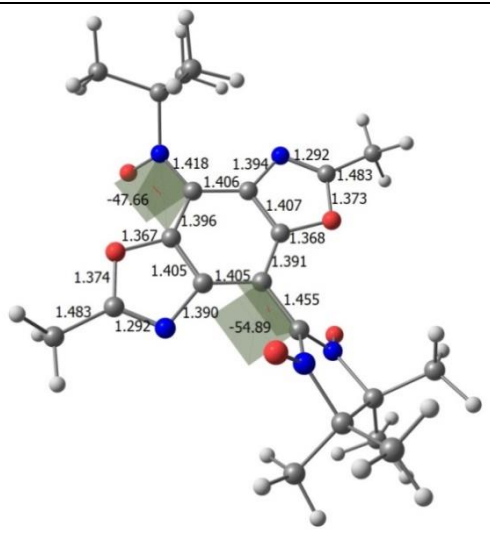

2,6-CH<sub>3</sub>-4,8-SC

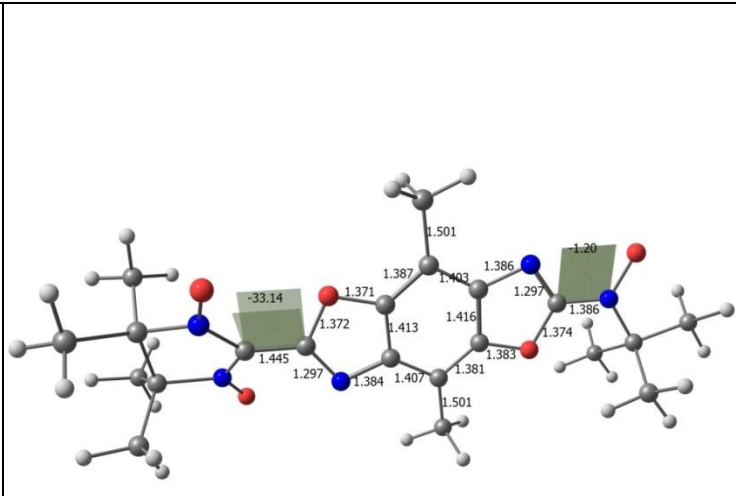

4,8-CH<sub>3</sub>-2,6-SC

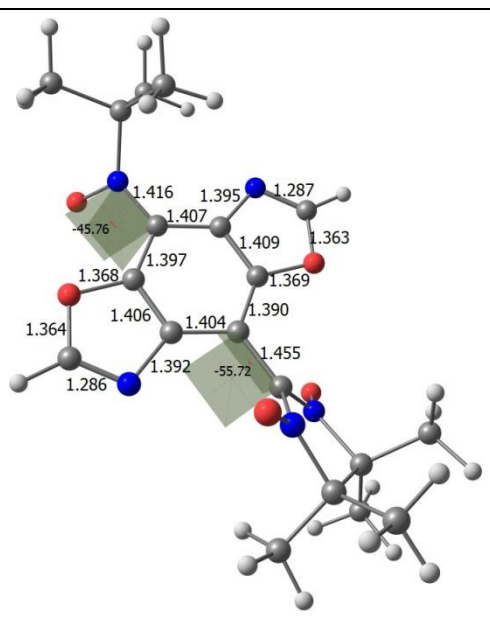

2,6-H-4,8-SC

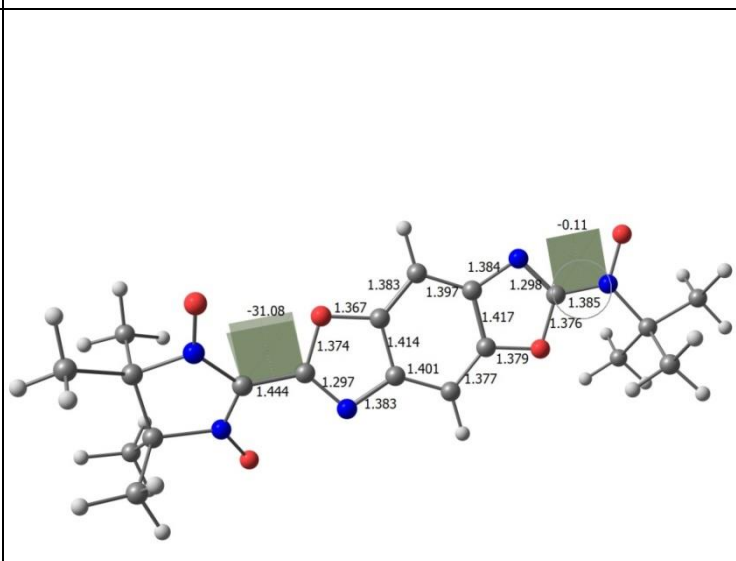

4,8-H-2,6-SC

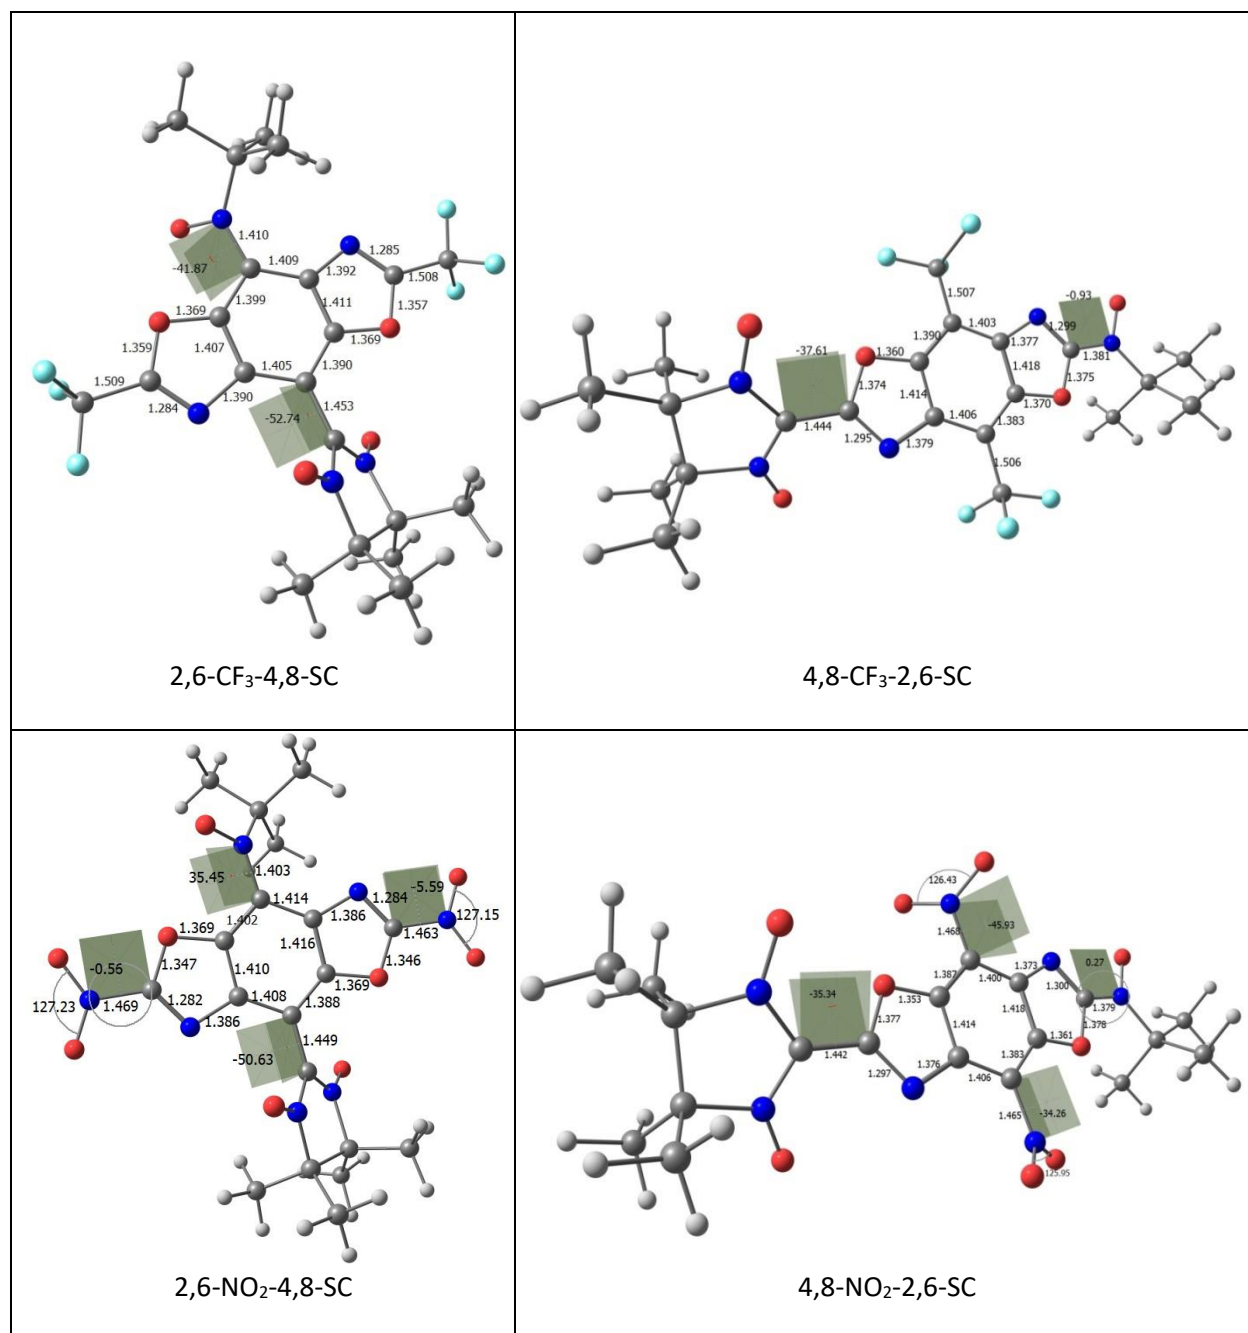

**Figure S2.** Geometries of diradicalized BBOs showing the bond distances (Å) within the coupler. Dihedral angles (degrees) between the BBO plane and the plane of SCs are also given which are measured according to the sequence C–C–N–O for NO and C–C–C–N for NN.

1. K. C. Ko, D. Cho and J. Y. Lee, *The Journal of Physical Chemistry A*, 2013, **117**, 3561-3568.
